# Supplementary material for: Multi-Omics Analysis Reveals MicroRNAs Associated With Cardiometabolic Traits
Source: PubMed Central journal article supplement (PMC7056871; doi:10.3389/fgene.2020.00110), 2020-02-27

## Supplementary Material

### 1 Supplementary Data

#### Measurements on cardiometabolic risk factors and diseases in the Rotterdam Study

Anthropometric measurements: Participants were measured in standing position in light clothes without shoes. Waist circumference was measured midway between the low rib margin and iliac crest. Measurements of hip circumference were measured at the point resulting in the maximum circumference over the buttocks. Body-mass index was calculated as weight (kg) divided by the square of height (m). Waist-hip ratio was calculated as waist circumference divided by hip circumference.

Type 2 Diabetes and glycemic traits: Type 2 diabetes was defined according to the current WHO guidelines: fasting blood glucose levels  $\geq 7.0$  mmol/L, non-fasting blood glucose level of  $\geq 11.1$  mmol/L (when fasting samples were unavailable), or the use of blood glucose lowering medication. Information about medication was obtained from both questionnaires during home visits and pharmacy dispensing records. Concentrations of fasting glucose, non-fasting glucose, and fasting insulin levels were measured in serum (mmol/L) from blood samples obtained at the visit to the research center. Parameters were measured with a Roche Modular P800 at Erasmus MC AKC laboratory.

Lipid traits: Blood samples of participants were obtained during the visit to the research center. Using automatic enzymatic method levels of high-density lipoprotein (HDL), total cholesterol (TC) and triglyceride (TG) were measured in serum (mmol/L). Low-density lipoprotein (LDL) concentration was calculated via the Friedewald formula ( $TC - HDL - (TG/5)$ ). Information about medication was obtained from both questionnaires during home visits and pharmacy dispensing records.

Cardiovascular traits: Systolic and diastolic blood pressure was measured (mmHg) in a sitting position after a period of rest and the mean value was taken as a phenotype for this analysis. Prevalent coronary heart disease was defined as myocardial infarction, coronary artery bypass graft surgery or percutaneous coronary intervention. Information about medication was obtained from both questionnaires during home visits and pharmacy dispensing record.

## 2 Supplementary Figures

### Supplementary Figure I. Predicted secondary structure of miRNA wild type and variant.

Location of the SNP is demonstrated by an arrow. The red part shows the mature sequence and the blue part shows the rest of the pre-miR. The corresponding minimum free energy (MFE) is illustrated with the thermodynamic ensemble  $\Delta G$ . **A**, Secondary structure of miR-196a2-3p wildtype and variant (rs11614913) located in mature miRNA sequence. MFE changes by -4.6kcal/mol. **B**, Secondary structure of miR-656 wildtype and variant (rs58834075) located in precursor miRNA sequence. MFE changes by -0.6kcal/mol. **C**, Secondary structure of miR-1908-5p wildtype and variant (rs174561) located in precursor miRNA sequence. MFE changes by +3.2kcal/mol.

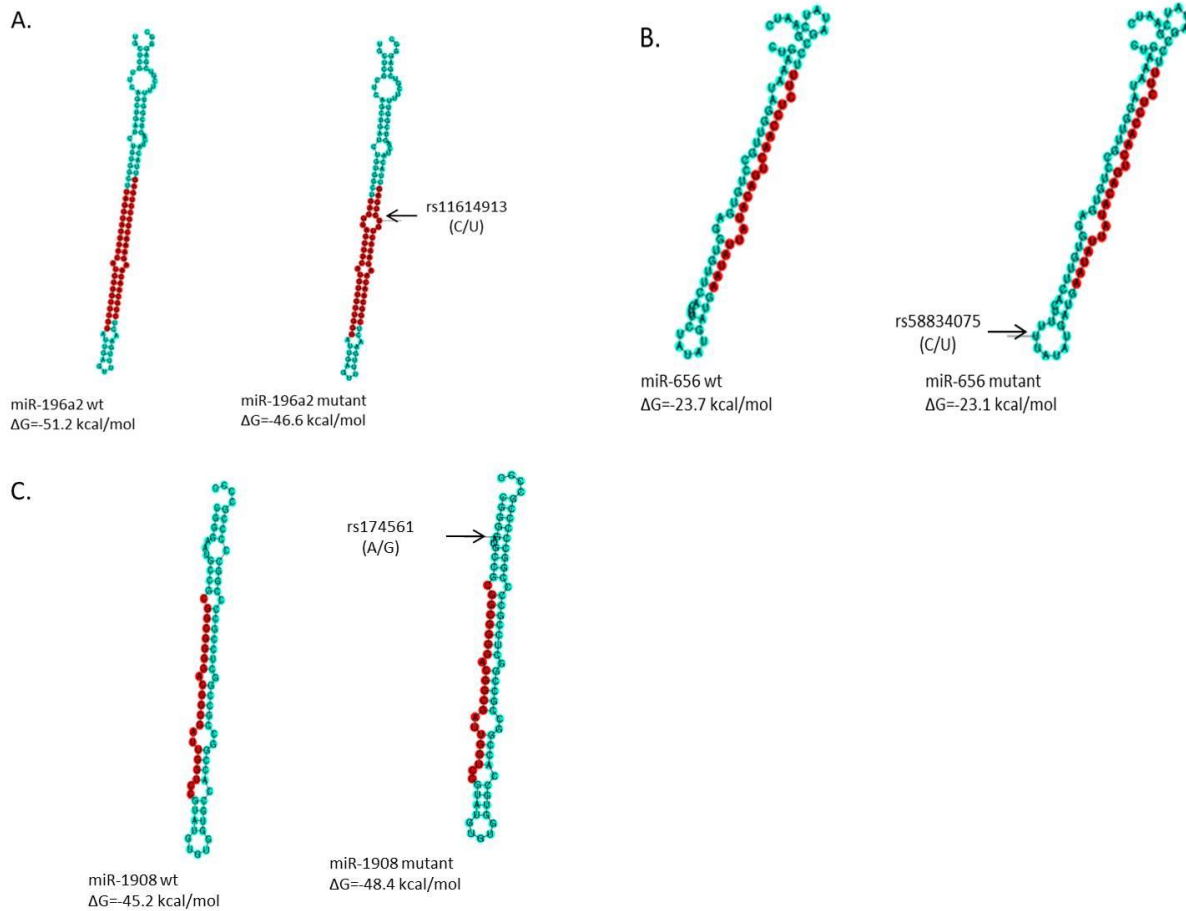

### 3 Supplementary Tables

**Supplementary Table 1. Description of GWAS meta-analysis and consortia used in this study**

| <b>Phenotype</b>             | <b>Consortia</b> | <b>Sample size</b>             | <b>All candidate SNPs in GWAS</b> |
|------------------------------|------------------|--------------------------------|-----------------------------------|
| <i>Anthropometric traits</i> |                  |                                |                                   |
| Body-mass index              | GIANT            | 241,258                        | 2,549                             |
| Waist to hip ratio           | GIANT            | 241,258                        | 2,531                             |
| Waist circumference          | GIANT            | 241,258                        | 2,533                             |
| <i>Glycemic traits</i>       |                  |                                |                                   |
| Glucose fasting              | MAGIC            | 133,010                        | 2,639                             |
| Glucose after 2h             | MAGIC            | 45,854                         | 48                                |
| Insulin fasting              | MAGIC            | 108,557                        | 2,637                             |
| Pro-insulin                  | MAGIC            | 10,701                         | 2,506                             |
| HbA1c                        | MAGIC            | 123,665                        | 887                               |
| HOMA-IR                      | MAGIC            | 46,186                         | 64                                |
| HOMA- $\beta$                | MAGIC            | 46,186                         | 37                                |
| Type 2 diabetes              | DIAGRAM          | 26,676 cases/ 132,532 controls | 10,690                            |
| <i>Lipid traits</i>          |                  |                                |                                   |
| Low-density lipoprotein      | GLGC             | 173,000                        | 2,377                             |
| High-density lipoprotein     | GLGC             | 187,000                        | 2,385                             |
| Total cholesterol            | GLGC             | 187,000                        | 2,385                             |
| Triglyceride                 | GLGC             | 178,000                        | 2,376                             |
| <i>Cardiovascular traits</i> |                  |                                |                                   |
| Coronary artery disease      | CARDIoGRMplusC4D | 60,801 cases/ 123,504 controls | 10,706                            |
| Diastolic blood pressure     | ICBP             | 71,255                         | 2,345                             |
| Systolic blood pressure      | ICBP             | 71,255                         | 2,345                             |

**Supplementary Table 2. Participant characteristics of the Rotterdam Study for DNA methylation analysis and miRNA expression profiling**

|                                    | DNA methylation<br>(RS-II-3 & RS-III-2) | DNA methylation<br>(RS-III-1) | miRNA expression<br>(RS-I-4 & RS-II-2) | P value* |
|------------------------------------|-----------------------------------------|-------------------------------|----------------------------------------|----------|
| N                                  | 717                                     | 721                           | 1999                                   |          |
| Female                             | 413 (57.6%)                             | 391 (54.2%)                   | 1141 (57.1%)                           | <0.001   |
| Age (years)                        | 67.5 (5.93)                             | 59.8 (8.16)                   | 71.6 (7.58)                            | <0.001   |
| BMI (kg/m <sup>2</sup> )           | 27.7 (4.12)                             | 27.6 (4.63)                   | 27.7 (4.11)                            | 0.905    |
| Waist circumference                | 94.4 (12.00)                            | 93.75 (12.92)                 | 93.6 (11.98)                           | 0.142    |
| WHR                                | 0.9 (0.09)                              | 0.9 (0.08)                    | 0.9 (0.09)                             | <0.001   |
| Current smoking (yes)              | 76 (10.6%)                              | 193 (26.8%)                   | 288 (14.4%)                            | <0.001   |
| Triglycerides (mmol/L)             | 1.5 (0.79)                              | 1.5 (0.88)                    | NA                                     | 0.298    |
| HDL-cholesterol (mmol/L)           | 1.5 (0.44)                              | 1.4 (0.41)                    | 1.4 (0.39)                             | <0.001   |
| LDL-cholesterol (mmol/L)           | 3.7 (0.94)                              | 3.9 (1.00)                    | NA                                     | <0.001   |
| Total cholesterol (mmol/L)         | 5.5 (1.02)                              | 5.6 (1.07)                    | 5.6 (0.99)                             | 0.004    |
| Lipid lowering medication (yes)    | 225 (31.4%)                             | 191 (26.5%)                   | 450 (22.5%)                            | <0.001   |
| Systolic blood pressure            | 144.8 (21.91)                           | 134.2 (19.76)                 | 148.2 (20.82)                          | <0.001   |
| Diastolic blood pressure           | 84.4 (11.66)                            | 82.8 (11.38)                  | 79.6 (10.84)                           | <0.001   |
| Coronary heart disease             | 28 (3.9%)                               | 46 (6.4%)                     | 214 (10.7%)                            | <0.001   |
| Anti-hypertensive medication (yes) | 310 (43.2%)                             | 217 (30.1%)                   | 880 (44.0%)                            | <0.001   |
| Glucose (mmol/L)                   | 5.7 (1.11)                              | 5.6 (1.04)                    | 5.8 (1.09)                             | 0.001    |
| Insulin (pmol/L)                   | 82.6 (48.26)                            | 96.0 (63.04)                  | NA                                     | <0.001   |
| Prevalence type 2 diabetes         | 96 (13.4%)                              | 74 (10.3%)                    | 278 (13.9%)                            | 0.04     |
| Anti-diabetic medication           | 59 (8.2%)                               | 39 (5.4%)                     | 132 (6.6%)                             | 0.0985   |

Values are presented as mean  $\pm$ (SD) or N (%).

\*Differences between groups were addressed using ANOVA in the case variables were available among three groups, Student's T-tests in the case variables were available in two groups.

NA: Not Available

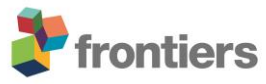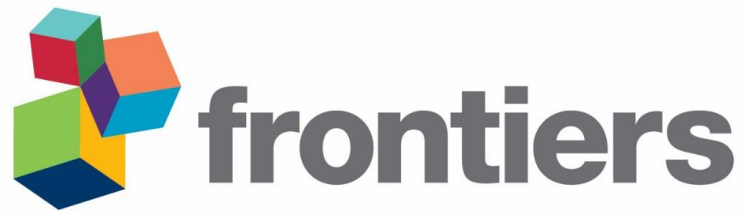

Supplement: DataSheet_1.pdf [file DataSheet_1.pdf]
